# Supplementary material
Source: PubMed Central journal article supplement (PMC10853866)
Supplement: jama-e240626-s004.pdf [file jama-e240626-s004.pdf]

\*First name, last name, and suffix (if applicable) are required and will appear in PubMed.

| <b>*Group Name(s): MARVEL Trial Investigators</b> |                   |                              |                         |                                                                                                                            |                                                 |                                                                |                                                                                                   |
|---------------------------------------------------|-------------------|------------------------------|-------------------------|----------------------------------------------------------------------------------------------------------------------------|-------------------------------------------------|----------------------------------------------------------------|---------------------------------------------------------------------------------------------------|
| <b>*First Name and Middle Initial(s)</b>          | <b>*Last Name</b> | <b>*Suffix (eg, Jr, III)</b> | <b>Academic Degrees</b> | <b>Institution</b>                                                                                                         | <b>Location (city, state/province, country)</b> | <b>Role or Contribution, eg, chair, principal investigator</b> | <b>Group (if more than 1 Group listed in the byline) and/or Subgroup (eg, Steering Committee)</b> |
| Yuanjun                                           | Shan              |                              | M.D.                    | Department of Neurology, Xiangzhou District People's Hospital                                                              | Xiangyang, Hubei 441000, China                  | Data collection                                                |                                                                                                   |
| Jie                                               | Pu                |                              | M.D.                    | Department of Neurology, Hubei Provincial Hospital of TCM                                                                  | Wuhan, Hubei 430000, China                      | Data collection                                                |                                                                                                   |
| Yang                                              | Ni                |                              | M.D.                    | Department of Neurology, Xi Chang People's Hospital                                                                        | Xichang, Sichuan 615000, China                  | Data collection                                                |                                                                                                   |
| Zongtao                                           | Liu               |                              | M.D.                    | Department of Neurology, Taihe Hospital of Traditional Chinese Medicine                                                    | Fuyang, Anhui 236000, China                     | Data collection                                                |                                                                                                   |
| Xin                                               | Zou               |                              | M.D.                    | Department of Neurology, The third Hospital of Mianyang, Mianyang                                                          | Sichuan 621000, China                           | Data collection                                                |                                                                                                   |
| Changchuan                                        | Wu                |                              | M.D.                    | Department of Neurology, Chengdu Second People's Hospital                                                                  | Chengdu, Sichuan 610000, China                  | Data collection                                                |                                                                                                   |
| Jiazuo                                            | Liu               |                              | M.D.                    | Department of Cerebrovascular Diseases, Dazhou Central Hospital                                                            | Dazhou, Sichuan 635000, China                   | Data collection                                                |                                                                                                   |
| Li                                                | Qi                |                              | M.D.                    | Department of Neurology, The 924th Hospital of The Chinese People's Liberation Army                                        | Guilin, Guangxi 541000, China                   | Data collection                                                |                                                                                                   |
| Junbin                                            | Chen              |                              | M.D.                    | Department of Neurology, Yuebei People's Hospital                                                                          | Shaoguan, Guangdong 512000, China               | Data collection                                                |                                                                                                   |
| Pengfei                                           | Wang              |                              | M.D.                    | Department of Neurology, Weihai Municipal Hospital                                                                         | Weihai, Shandong 264200, China                  | Data collection                                                |                                                                                                   |
| Jianfang                                          | Luan              |                              | M.D.                    | No. 2 Department of Internal Medicine, Chongqing sanbo Chang'an hospital                                                   | Jiangbei District, Chongqing 400000, China      | Data collection                                                |                                                                                                   |
| Da                                                | Liu               |                              | M.D.                    | Department of Neurology, The First People's Hospital of Yunnan Province                                                    | Kunming, Yunnan 650000, China                   | Data collection                                                |                                                                                                   |
| Bo                                                | Song              |                              | M.D.                    | Department of Neurology, Xianyang Hospital of Yan'an University                                                            | Xianyang, Shanxi 712000, China                  | Data collection                                                |                                                                                                   |
| Yonggang                                          | Hao               |                              | M.D.                    | Department of Neurology, Dushu Lake Hospital Affiliated to Soochow University and The Medical Center of Soochow University | Suzhou, Jiangsu 215000, China                   | Data collection                                                |                                                                                                   |
| Tao                                               | Qiu               |                              | M.D.                    | Department of Neurology, Zigong First People's Hospital                                                                    | Zigong, Sichuan 643000, China                   | Data collection                                                |                                                                                                   |
| Kuiyun                                            | Wang              |                              | M.D.                    | Department of Neurology, Jintang People's Hospital                                                                         | Chengdu, Sichuan 610400, China                  | Data collection                                                |                                                                                                   |

## Supplemental Online Content: Nonauthor Collaborators

\*First name, last name, and suffix (if applicable) are required and will appear in PubMed.

| *First Name and Middle Initial(s) | *Last Name | *Suffix (eg, Jr, III) | Academic Degrees | Institution                                                                           | Location (city, state/province, country) | Role or Contribution, eg, chair, principal investigator | Group (if more than 1 Group listed in the byline) and/or Subgroup (eg, Steering Committee) |
|-----------------------------------|------------|-----------------------|------------------|---------------------------------------------------------------------------------------|------------------------------------------|---------------------------------------------------------|--------------------------------------------------------------------------------------------|
| Zuopeng                           | Li         |                       | M.D.             | Department of Neurology, Changzhi People's Hospital                                   | Changzhi, Shanxi 046000, China           | Data collection                                         |                                                                                            |
| Junsheng                          | Liu        |                       | M.D.             | Department of Neurology, The People's Hospital of Pingchang                           | Bazhong, Sichuan 636600, China           | Data collection                                         |                                                                                            |
| Zhenqiang                         | Li         |                       | M.D.             | Department of Neurology, Ningbo Medical Center Lihuili Hospital                       | Ningbo, Zhejiang 315000, China           | Data collection                                         |                                                                                            |
| Yanling                           | Li         |                       | M.D.             | Department of Neurology, Shenqiu County People's Hospital                             | Zhokou, Henan 466300, China              | Data collection                                         |                                                                                            |
| Shuang                            | Yang       |                       | M.D.             | Department of Neurology, People's Hospital of Zunyi City Bo Zhou District             | Zunyi, Guizhou 563100, China             | Data collection                                         |                                                                                            |
| Xiaoli                            | Lin        |                       | M.D.             | Department of Neurology, Nanping First Hospital                                       | Nanping, Fujian 353000, China            | Data collection                                         |                                                                                            |
| Wen                               | Cheng      |                       | M.D.             | Department of Neurology, Affiliated Hospital of Chengdu University                    | Chengdu, Sichuan 610000, China           | Data collection                                         |                                                                                            |
| Anqiang                           | Chen       |                       | M.D.             | Department of Neurology, The Third People's Hospital of Guiyang                       | Guiyang, Guizhou 550000, China           | Data collection                                         |                                                                                            |
| Shiqiang                          | Yan        |                       | M.D.             | Department of Neurology, Dianjiang People's Hospital of Chongqing                     | Dianjiang, Chongqing 408300, China       | Data collection                                         |                                                                                            |
| Shudong                           | Liu        |                       | M.D.             | Department of Neurology, Yongchuan Hospital of Chongqing Medical University           | Yongchuan, Chongqing 402100, China       | Data collection                                         |                                                                                            |
| Jie                               | Du         |                       | M.D.             | Department of Neurology, The People's Hospital of Kaizhou Distric                     | Kaizhou, Chongqing 405400, China         | Data collection                                         |                                                                                            |
| Zhuo                              | Chen       |                       | M.D.             | Department of Neurology, Mianzhu People's Hospital                                    | Deyang, Sichuan 618000, China            | Data collection                                         |                                                                                            |
| Bo                                | Song       |                       | M.D.             | Department of Neurology, Meishan City People's Hospital                               | Meishan, Sichuan 620000, China           | Data collection                                         |                                                                                            |
| Li                                | Yao        |                       | M.D.             | Department of Neurology, Xian XD Group Hospital                                       | Xi'an, Shanxi 710000, China              | Data collection                                         |                                                                                            |
| Deyan                             | Kong       |                       | M.D.             | Department of Neurology, The Second Affiliated Hospital of Guangxi Medical University | Nanning, Guangxi 530000, China           | Data collection                                         |                                                                                            |
| Hongjun                           | Wang       |                       | M.D.             | Department of Neurology, Chongqing Fengdu People's Hospital                           | Fengdu, Chongqing 408200, China          | Data collection                                         |                                                                                            |
| Shouchun                          | Wang       |                       | M.D.             | Department of Neurology, The First Bethune Hospital of Jilin University               | Changchun, Jilin 130000, China           | Data collection                                         |                                                                                            |

## Supplemental Online Content: Nonauthor Collaborators

\*First name, last name, and suffix (if applicable) are required and will appear in PubMed.

| *First Name and Middle Initial(s) | *Last Name | *Suffix (eg, Jr, III) | Academic Degrees | Institution                                                                                                                               | Location (city, state/province, country)    | Role or Contribution, eg, chair, principal investigator | Group (if more than 1 Group listed in the byline) and/or Subgroup (eg, Steering Committee) |
|-----------------------------------|------------|-----------------------|------------------|-------------------------------------------------------------------------------------------------------------------------------------------|---------------------------------------------|---------------------------------------------------------|--------------------------------------------------------------------------------------------|
| Xunfeng                           | Zhu        |                       | M.D.             | Department of Neurology, Guiyang Huaxi District People's Hospital                                                                         | Guiyang, Guizhou 550000, China              | Data collection                                         |                                                                                            |
| Yue                               | Wan        |                       | M.D.             | Department of Neurology, The Third People's Hospital of Hubei Province                                                                    | Wuhan, Hubei 430000, China                  | Data collection                                         |                                                                                            |
| Haojin                            | Zhao       |                       | M.D.             | Department of Neurology, The Second People's Hospital of Mengjin District                                                                 | Luoyang , Henan 471000, China               | Data collection                                         |                                                                                            |
| Qingchun                          | Mou        |                       | M.D.             | Department of Neurology, GaoZhou People's Hospital                                                                                        | Gaozhou, Guangdong 525200, China            | Data collection                                         |                                                                                            |
| Ling                              | Dai        |                       | M.D.             | Department of Neurology, Luxian People's Hospital                                                                                         | Luzhou, Sichuan 646000, China               | Data collection                                         |                                                                                            |
| Shui                              | Yu         |                       | M.D.             | Department of Neurology, The People's Hospital Of Dujiangyan                                                                              | Dujiangyan, Sichuan 611800, China           | Data collection                                         |                                                                                            |
| Dongsheng                         | Ju         |                       | M.D.             | Department of Invasive Technology, Songyuan Jinlin Oilfield Hospital                                                                      | Songyuan, Jinlin 138000, China              | Data collection                                         |                                                                                            |
| Wenguo                            | Huang      |                       | M.D.             | Department of encephalopathy, Maoming Hospital of traditional Chinese Medicine                                                            | Maoming 525000, Guangdong, China            | Data collection                                         |                                                                                            |
| Yihong                            | Huang      |                       | M.D.             | Department of Neurology, Houjie Hospital Of Dongguan                                                                                      | Dongguan, Guangdong 523000, China           | Data collection                                         |                                                                                            |
| Weilin                            | Kong       |                       | M.D.             | Department of Neurology, Xinqiao Hospital and The Second Affiliated Hospital, Army Medical University (Third Military Medical University) | Shapingba District, Chongqing 400013, China | Data collection                                         |                                                                                            |
| Wenzhe                            | Sun        |                       | M.D.             | Department of Neurology, Xinqiao Hospital and The Second Affiliated Hospital, Army Medical University (Third Military Medical University) | Shapingba District, Chongqing 400013, China | Data collection                                         |                                                                                            |
| Xiaolei                           | Shi        |                       | M.D.             | Department of Neurology, Xinqiao Hospital and The Second Affiliated Hospital, Army Medical University (Third Military Medical University) | Shapingba District, Chongqing 400013, China | Data collection                                         |                                                                                            |
| Shihai                            | Yang       |                       | M.D.             | Department of Neurology, Xinqiao Hospital and The Second Affiliated Hospital, Army Medical University (Third Military Medical University) | Shapingba District, Chongqing 400013, China | Data collection                                         |                                                                                            |
| Zhixi                             | Wang       |                       | M.D.             | Department of Neurology, Xinqiao Hospital and The Second Affiliated Hospital, Army Medical University (Third Military Medical University) | Shapingba District, Chongqing 400013, China | Data collection                                         |                                                                                            |

## Supplemental Online Content: Nonauthor Collaborators

\*First name, last name, and suffix (if applicable) are required and will appear in PubMed.

| *First Name and Middle Initial(s) | *Last Name | *Suffix (eg, Jr, III) | Academic Degrees | Institution                                                                                                                                | Location (city, state/province, country)    | Role or Contribution, eg, chair, principal investigator | Group (if more than 1 Group listed in the byline) and/or Subgroup (eg, Steering Committee) |
|-----------------------------------|------------|-----------------------|------------------|--------------------------------------------------------------------------------------------------------------------------------------------|---------------------------------------------|---------------------------------------------------------|--------------------------------------------------------------------------------------------|
| Yan                               | Tian       |                       | M.D.             | Department of Neurology, Xinqiao Hospital and The Second Affiliated Hospital, Army Medical University (Third Military Medical University)  | Shapingba District, Chongqing 400013, China | Data collection                                         |                                                                                            |
| Yangmei                           | Chen       |                       | M.D.             | Department of Neurology, The Second Affiliated Hospital of Chongqing Medical University                                                    | Yuzhong District 400042, China;             | Data and Safety Monitoring Board                        |                                                                                            |
| Chen                              | Liu        |                       | M.D.             | Department of Radiology, Southeast Hospital and The First Affiliated Hospital, Army Medical University (Third Military Medical University) | Shapingba District, Chongqing 400013, China | Data and Safety Monitoring Board                        |                                                                                            |
| Rufu                              | Xu         |                       | M.D.             | Department of Statistics, Xinqiao Hospital and The Second Affiliated Hospital, Army Medical University (Third Military Medical University) | Shapingba District, Chongqing 400013, China | Data and Safety Monitoring Board                        |                                                                                            |
