# Supplementary material
Source: PubMed Central journal article supplement (PMC10853866)
Supplement: jama-e240626-s005.pdf [file jama-e240626-s005.pdf]

## Data Sharing Statement

Yang. Methylprednisolone as Adjunct to Endovascular Thrombectomy for Large Vessel Occlusion Stroke. *JAMA*. Published February 08, 2024. doi:10.1001/jama.2024.0626

### Data

**Data available:** Yes

**Data types:** Deidentified participant data

**How to access data:** Data will be available for reasonable requests from [ziwenjie1981@163.com](mailto:ziwenjie1981@163.com)

**When available:** beginning date: 10-25-2024

### Supporting Documents

**Document types:** Statistical/analytic code

**How to access documents:** The Code will be available for reasonable requests from [ziwenjie1981@163.com](mailto:ziwenjie1981@163.com)

**When available:** beginning date: 10-25-2024

### Additional Information

**Who can access the data:** Researchers whose proposed use of the data has been approved

**Types of analyses:** For research purpose

**Mechanisms of data availability:** After approval of a proposal
